# Supplementary material for: Chemically-resolved determination of hydrogenated graphene–substrate interaction
Source: Royal Society of Chemistry journal article supplement (doi:10.1039/c9cp02059d), 2019-01-01
Supplement: c9cp02059d1.pdf [file c9cp02059d1.pdf]

## Chemically-resolved determination of hydrogenated graphene-substrate interaction.

<sup>a</sup>Anders L. Jørgensen, <sup>b</sup>David A. Duncan, <sup>a</sup>Claus F. P. Kastorp, <sup>a</sup>Line Kyhl, <sup>a</sup>Zeyuan Tang, <sup>c</sup>Albert Bruix, <sup>c</sup>Mie Andersen, <sup>a</sup>Bjørk Hammer, <sup>b</sup>Tien-Lin Lee, <sup>a</sup>Liv Hornekær, and <sup>\*a</sup>Richard Balog.

<sup>a</sup>Department of Physics and Astronomy and Interdisciplinary Nanoscience Center (iNANO), Aarhus University, 8000 Aarhus C, Denmark.

<sup>b</sup>Diamond Light Source Ltd., Harwell Science and Innovation Campus, Didcot, OX11 0DE, UK

<sup>c</sup>Chair for Theoretical Chemistry and Catalysis Research Center, Technische Universität München, Lichtenbergstr. 4, D-85747 Garching, Germany

### Reference layer for estimation of coherent fraction and position from theoretical models:

The standing wave in X-ray standing wave (XSW) measurements is formed deep inside the crystal with a periodicity equal to the bulk separation of Ir(111) planes. The standing wave extends above the surface with the same bulk-derived periodicity and is insensitive to the very last layers, which are slightly distorted with respect to the bulk geometry due to surface formation and the presence of a graphene layer above.

For a more accurate comparison to the experiment we use the second iridium layer in the DFT models as a reference layer, as this layer is the best approximation to the bulk-like behavior in our calculations. Figure S1 shows an example for clean graphene on iridium. The reference layer in the figure is marked with a dashed line. This line marks the position from which we calculate the coherent position, coherent fraction and adsorption height (see below). The distortion (contraction) in the direction normal to the surface plane between the first two iridium layers in this model was found to be approx. 0.0062 Å – referred to as XSW offset in Figure S1. The adsorption height used in the article refers to an average distance between graphene and the bulk-derived position of the first iridium layer. In the example in Figure S1 it is thus smaller by a distance equal to the XSW offset than the average graphene-iridium distance  $d_{av}$ , where the first iridium layer is used as a reference.

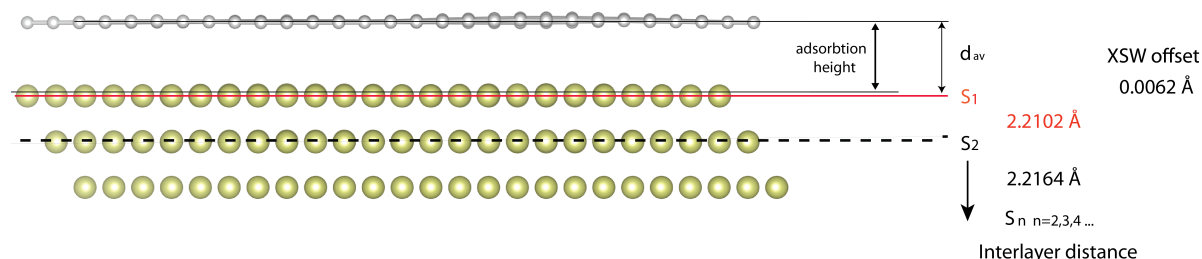

**Figure S1.** Side view of a (10 × 10) clean graphene sheet on a three-layered (9 × 9) Ir(111) slab calculated using the optB88-vdW functional. The average distance between the 1<sup>st</sup> and 2<sup>nd</sup> layer shows a small offset with respect to the bulk distance. The separation between layers and the corresponding offset with respect to bulk distances are indicated on the right. The  $d_{av}$  marks the average separation between graphene and the relaxed first iridium layer. XSW height shows the distance between graphene and the bulk derived (un-relaxed) position of the first layer.

### Coherent position, coherent fraction and XSW height:

The coherent fraction and the coherent position has been calculated using the following equations:<sup>1</sup>

$$F^H = (G_H^c{}^2 + G_H^s{}^2)^{\frac{1}{2}},$$

$$P^H = (2\pi)^{-1} \tan^{-1} \left( \frac{G_H^s}{G_H^c} \right) \begin{cases} +0.5 & \text{if } G_H^c < 0 \\ +0 & \text{otherwise} \end{cases}.$$

Where:

$$G_H^c = N^{-1} \sum_{i=1}^N \cos(2\pi P_i^H),$$

$$G_H^s = N^{-1} \sum_{i=1}^N \sin(2\pi P_i^H).$$

Here  $P_i^H$  is the position of a single atom with respect to bulk reference layer, derived as mentioned above. The XSW height can be calculated either from the obtained coherent position or simply by taking the average distance of carbon atoms from the bulk derived position of the first layer as shown in Figure S1.

Analysis of coherent positions and fractions for DFT optimized hydrogen structures:

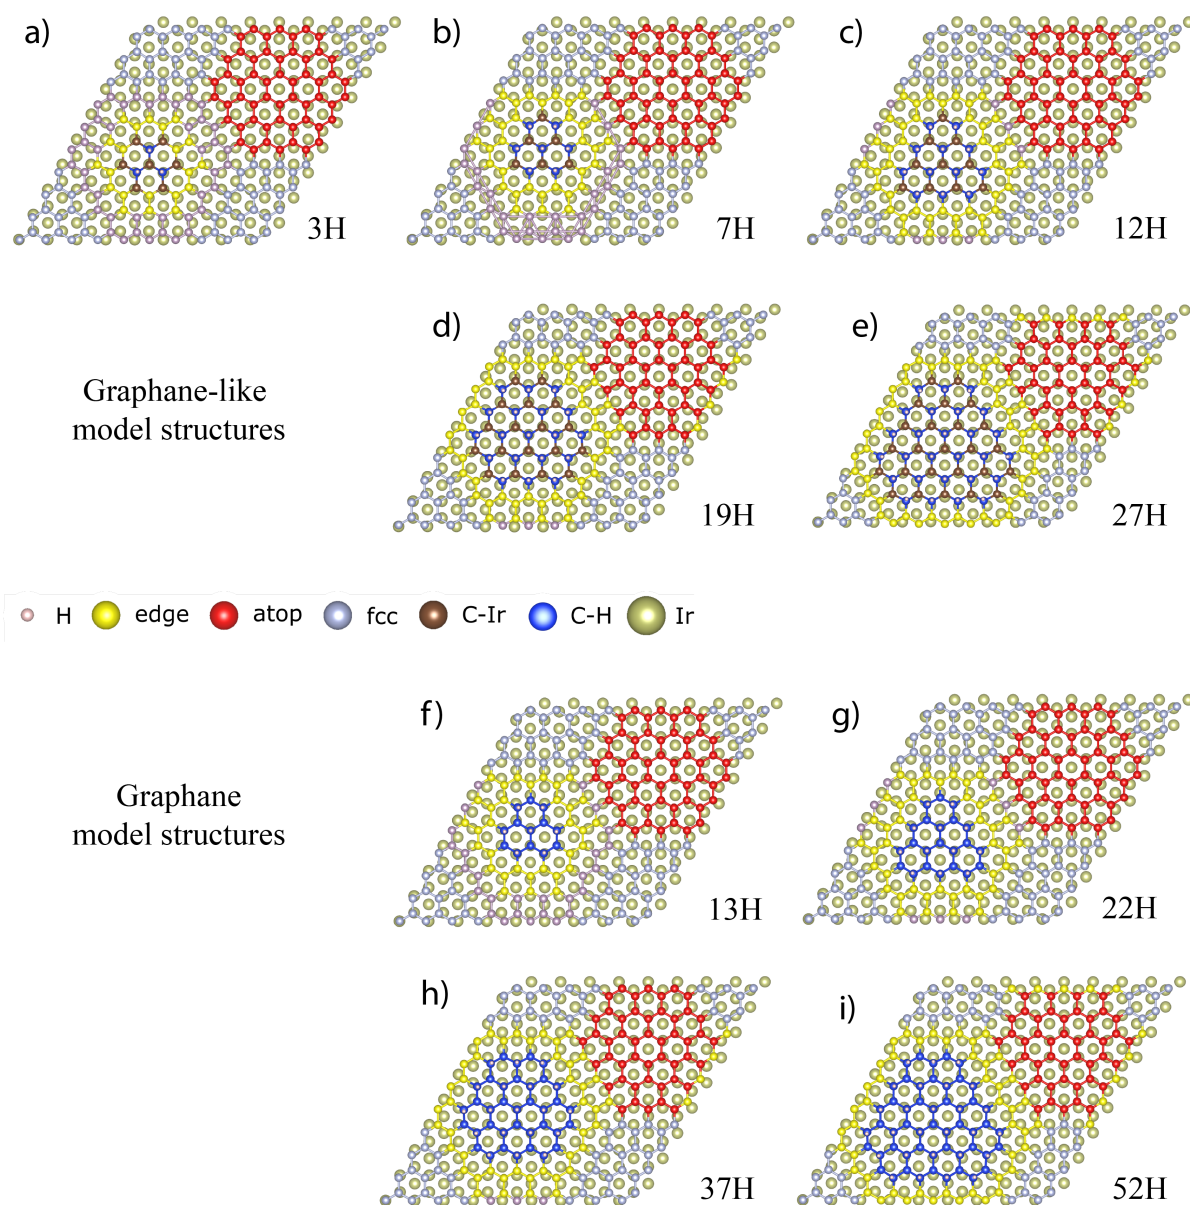

**Figure S2.** DFT-optimized structures of graphene on Ir functionalized with hydrogen using a color-coded selection of carbon atoms. The moiré structure consists of an  $10 \times 10$  graphene supercell on a  $9 \times 9$  iridium supercell. The  $sp^3$  carbon is marked brown and  $sp^2$  carbon on atop regions (red), fcc region (silver) and the cluster edge (yellow). a) to e) top view of structures with different sizes of graphane-like (3H, 7H, 12H, 19H and 27H) and f) to i) graphane (4H, 13H, 22H, 37H, 52H) cluster. The coherent positions, fractions and number of atoms per supercell for different groups of carbon atoms are summarized in Table S1.

|                                               | Graphane-like structure model |      |      |      |      |      | Graphane structure model |      |      |      |
|-----------------------------------------------|-------------------------------|------|------|------|------|------|--------------------------|------|------|------|
|                                               | 0H                            | 3H   | 7H   | 12H  | 19H  | 27H  | 13H                      | 22H  | 37H  | 52H  |
| <b>Number of C atoms per moiré</b>            |                               |      |      |      |      |      |                          |      |      |      |
| <b>sp<sup>3</sup></b>                         | 0                             | 10   | 13   | 22   | 37   | 52   | 13                       | 22   | 37   | 52   |
| <b>sp<sup>2</sup></b>                         | 200                           | 190  | 187  | 178  | 163  | 148  | 187                      | 178  | 163  | 148  |
| <b>atop</b>                                   | 54                            | 54   | 54   | 54   | 48   | 45   | 54                       | 54   | 48   | 45   |
| <b>FCC</b>                                    | 73                            | 73   | 73   | 73   | 64   | 47   | 73                       | 73   | 64   | 46   |
| <b>HCP</b>                                    | 73                            | 42   | 27   | 9    | 3    | 0    | 27                       | 9    | 3    | 0    |
| <b>edge</b>                                   | 0                             | 21   | 33   | 42   | 48   | 56   | 33                       | 42   | 48   | 57   |
| <b>Ir-C</b>                                   | --                            | 7    | 6    | 10   | 18   | 25   | --                       | --   | --   | --   |
| <b>C-H</b>                                    | --                            | 3    | 7    | 12   | 19   | 27   | 13                       | 22   | 37   | 52   |
| <b>Coherent position <math>P^{111}</math></b> |                               |      |      |      |      |      |                          |      |      |      |
| <b>sp<sup>3</sup></b>                         | --                            | 0.12 | 0.11 | 0.10 | 0.08 | 0.08 | 0.69                     | 0.77 | 0.78 | 0.84 |
| <b>sp<sup>2</sup></b>                         | 0.60                          | 0.57 | 0.57 | 0.56 | 0.55 | 0.54 | 0.60                     | 0.61 | 0.62 | 0.63 |
| <b>atop</b>                                   | 0.66                          | 0.66 | 0.66 | 0.65 | 0.64 | 0.63 | 0.65                     | 0.63 | 0.61 | 0.61 |
| <b>FCC</b>                                    | 0.57                          | 0.59 | 0.59 | 0.59 | 0.60 | 0.62 | 0.58                     | 0.58 | 0.59 | 0.58 |
| <b>HCP</b>                                    | 0.58                          | 0.49 | 0.47 | 0.42 | 0.45 | --   | 0.58                     | 0.60 | 0.57 | --   |
| <b>edge</b>                                   | --                            | 0.28 | 0.25 | 0.25 | 0.27 | 0.30 | 0.61                     | 0.65 | 0.66 | 0.68 |
| <b>Ir-C</b>                                   | --                            | 0.07 | 0.99 | 0.98 | 0.97 | 0.97 | --                       | --   | --   | --   |
| <b>C-H</b>                                    | --                            | 0.25 | 0.21 | 0.19 | 0.18 | 0.18 | --                       | --   | --   | --   |
| <b>Coherent fraction <math>F^{111}</math></b> |                               |      |      |      |      |      |                          |      |      |      |
| <b>sp<sup>3</sup></b>                         | --                            | 0.87 | 0.78 | 0.77 | 0.77 | 0.76 | 0.75                     | 0.75 | 0.72 | 0.72 |
| <b>sp<sup>2</sup></b>                         | 0.97                          | 0.77 | 0.66 | 0.59 | 0.55 | 0.50 | 0.97                     | 0.97 | 0.96 | 0.93 |
| <b>atop</b>                                   | 0.99                          | 0.98 | 0.95 | 0.93 | 0.89 | 0.86 | 0.99                     | 0.99 | 0.99 | 1.00 |
| <b>FCC</b>                                    | 0.99                          | 0.99 | 0.97 | 0.95 | 0.93 | 0.95 | 0.99                     | 0.99 | 0.99 | 0.99 |
| <b>HCP</b>                                    | 0.99                          | 0.94 | 0.94 | 0.99 | 0.99 | --   | 0.99                     | 1.00 | 1.00 | --   |
| <b>edge</b>                                   | --                            | 0.90 | 0.82 | 0.76 | 0.76 | 0.71 | 0.98                     | 0.97 | 0.95 | 0.92 |
| <b>Ir-C</b>                                   | --                            | 0.98 | 0.99 | 0.98 | 0.97 | 0.96 | --                       | --   | --   | --   |
| <b>C-H</b>                                    | --                            | 1.00 | 0.99 | 0.99 | 0.98 | 0.97 | --                       | --   | --   | --   |

**Table S1:** Detailed analysis of the number of atoms, coherent positions and coherent fractions for the hydrogenated graphene for sp<sup>2</sup> and sp<sup>3</sup> atoms within the moiré supercell as well as for the groups of atoms specified and depicted in Figure S2.

### Formation energy of hydrogen clusters:

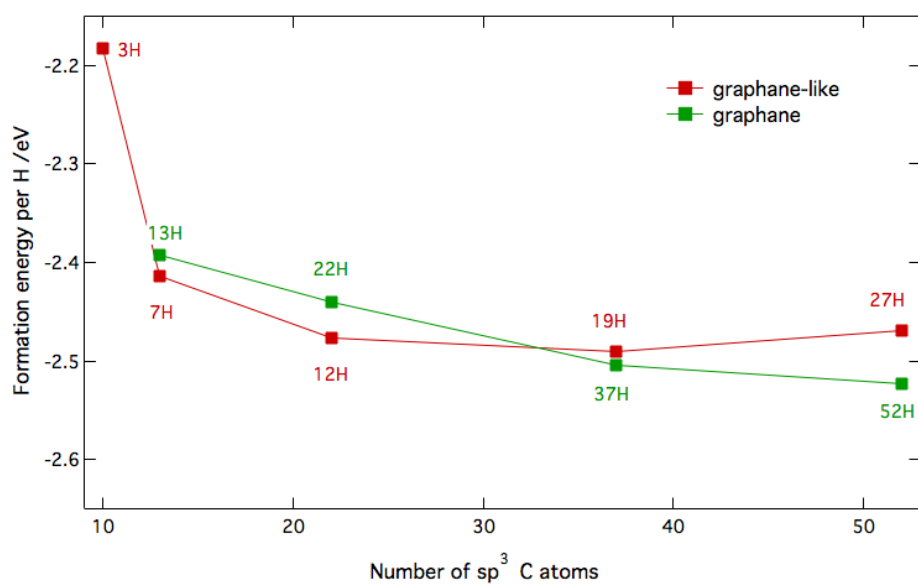

**Figure S3.** Formation energies for different hydrogen clusters obtained from DFT optimized model structures shown in Figure S2.

### References:

- (1) Zegenhagen, J. Surface Structure Determination with X-Ray Standing Waves. *Surf. Sci. Rep.* **1993**, *18* (7–8), 202–271
